# Supplementary material for: Liver Resection and Transplantation Following Yttrium-90 Radioembolization for Primary Malignant Liver Tumors: A 15-Year Single-Center Experience
Source: MDPI journal article supplement (doi:10.3390/cancers15030733), 2023-01-25
Supplement: s1 [file s1]

# Supplementary Materials

## Tables

**Table S1.** Recurrence outcomes.

|                                  | Resected (n= 21) |                 | Transplanted (n=13) |
|----------------------------------|------------------|-----------------|---------------------|
| <b>Number of recurrences</b>     | <b>7 (33.3)</b>  |                 | <b>3 (23.1)</b>     |
| <b>Tumor type</b>                |                  |                 |                     |
| • HCC                            | 6 (46.2)         |                 | 3 (23.1)            |
| • ICC                            | 1 (12.5)         |                 | -                   |
| <b>Site of first recurrence</b>  | <b>ICC</b>       | <b>HCC</b>      | <b>HCC</b>          |
| <b>Liver only</b>                | <b>1 (12.5)</b>  | <b>3 (14.3)</b> | <b>1 (7.7)</b>      |
| <b>Liver + nonliver sites</b>    | <b>0 (0.0)</b>   | <b>1 (4.8)</b>  | <b>1 (7.7)</b>      |
| • Liver + bone                   | 0 (0.0)          | 0 (0.0)         | 1 (7.7)             |
| • Liver + lung                   | 0 (0.0)          | 1 (4.8)         | 0 (0.0)             |
| <b>Extrahepatic</b>              | <b>0 (0.0)</b>   | <b>2 (9.5)</b>  | <b>1 (7.7)</b>      |
| • Diaphragm + bone + adenophatic | 0 (0.0)          | 0 (0.0)         | 1 (7.7)             |
| • Lung + cerebral                | 0 (0.0)          | 1 (4.8)         | 0 (0.0)             |
| • Bone                           | 0 (0.0)          | 1 (4.8)         | 0 (0.0)             |

*Data are expressed as n (%) unless otherwise specified*  
*HCC hepatocellular carcinoma, ICC intrahepatic cholangiocarcinoma*

## Figures

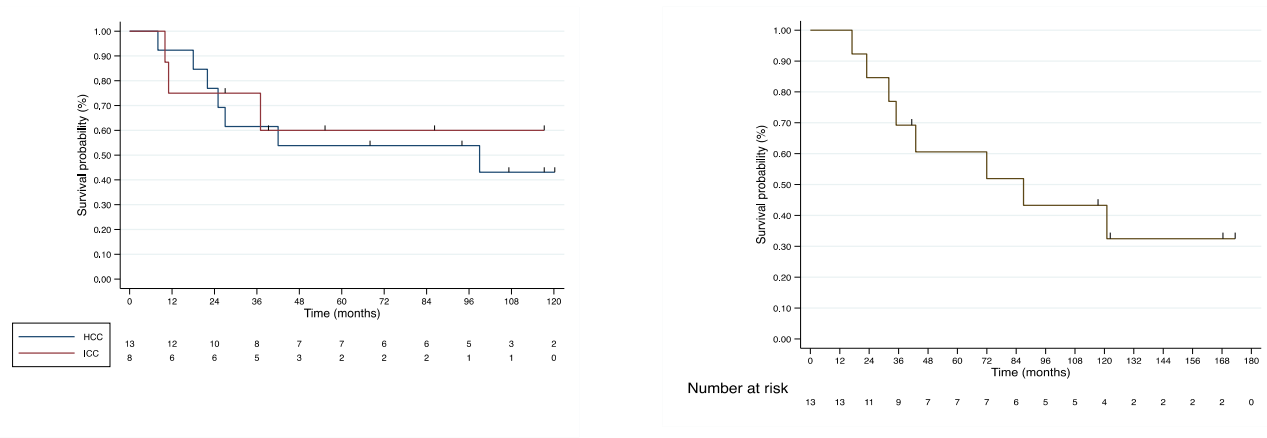

**Figure S1. a** Kaplan-Meier DFS curves from diagnosis for LR group according to diagnosis. **b** Kaplan-Meier DFS curves from liver transplantation
